# Supplementary material
Source: PubMed Central journal article supplement (PMC4211964)
Supplement: NIHMS625530-supplement-Supp_FigureS1-S3.pdf [file NIHMS625530-supplement-Supp_FigureS1-S3.pdf]

*Myocd*<sup>K1/+</sup>

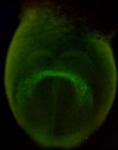

E7.5

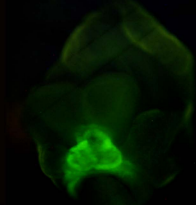

E8.0

*Myocd*<sup>Kl/+</sup>; *R26R*<sup>r/r</sup> E15.5

**A**

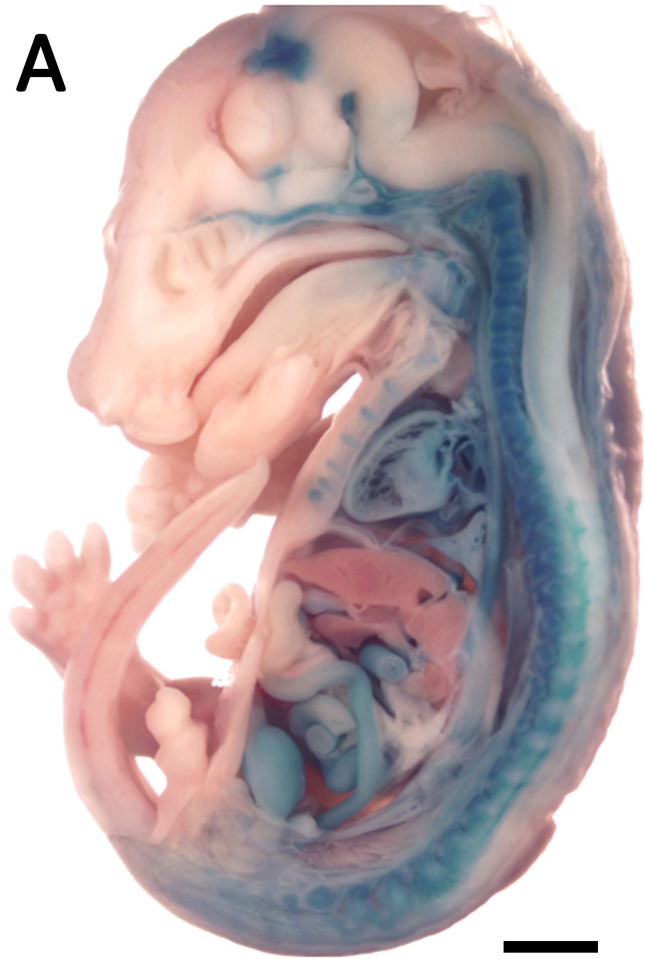

**B**

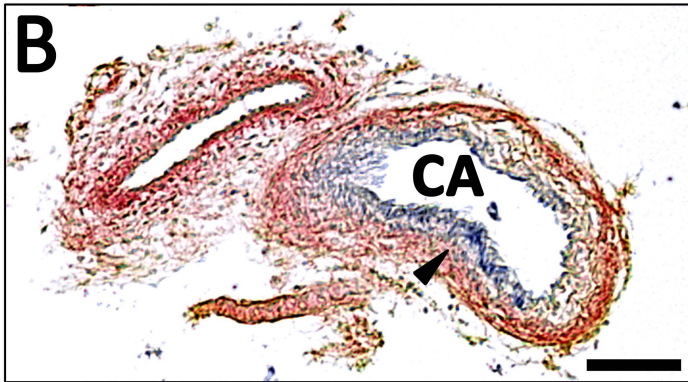

**C**

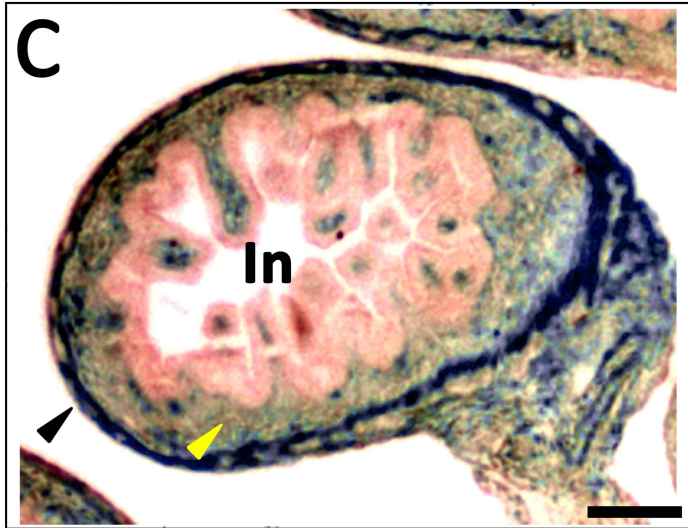

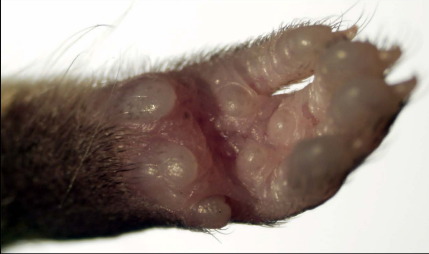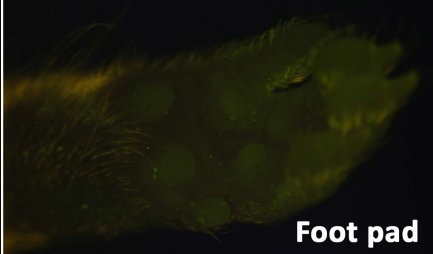

**Foot pad**

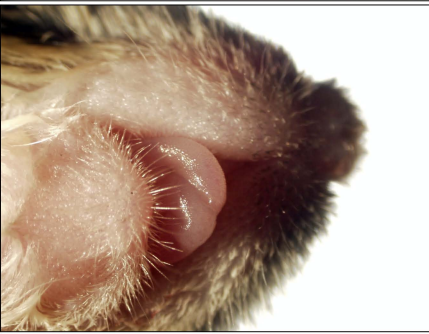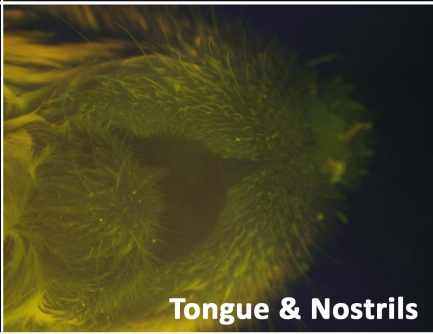

**Tongue & Nostrils**

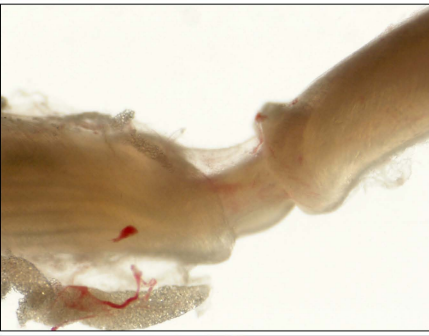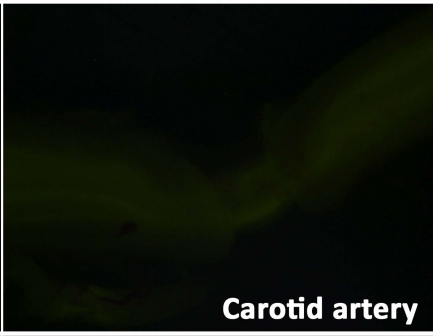

**Carotid artery**

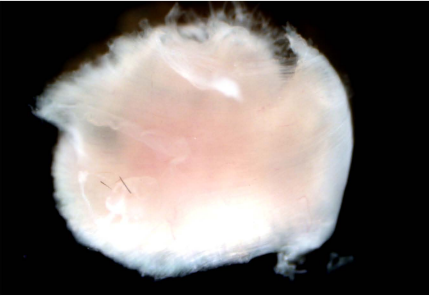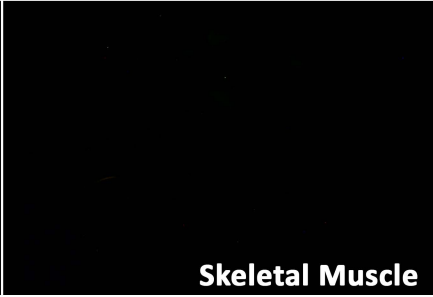

**Skeletal Muscle**
